# Supplementary material for: Association of subclinical inflammation with deterioration of glycaemia before the diagnosis of type 2 diabetes: the KORA S4/F4 study
Source: Springer Nature journal article supplement (doi:10.1007/s00125-015-3679-4), 2015-07-08
Supplement: MOESM1 [file 125_2015_3679_MOESM1_ESM.pdf › 125_2015_3679_MOESM1_ESM.pdf]

**ESM Table 1** – Drop-out analysis: comparison of the baseline characteristics of the study population (KORA S4, 1999-2001) with and without participation in KORA F4 (2006-2008)

| <b>Variable</b>                                                                 | <b>Participation in<br/>KORA F4 (n=1161)</b> | <b>No participation in<br/>KORA F4 (n=492)</b> | <b><i>p</i></b> |
|---------------------------------------------------------------------------------|----------------------------------------------|------------------------------------------------|-----------------|
| Age (years)                                                                     | 63 (59; 68)                                  | 66 (61; 70)                                    | <0.001          |
| Sex (% male/female)                                                             | 51.2 / 48.8                                  | 51.4 / 48.6                                    | 0.788           |
| Waist circumference (cm)                                                        | 95.6 (87.8; 102.5)                           | 97.7 (90.2; 106.0)                             | <0.001          |
| Body mass index (kg/m <sup>2</sup> )                                            | 27.9 (25.7; 30.6)                            | 28.5 (25.9; 31.9)                              | 0.023           |
| HbA <sub>1c</sub> (%) <sup>a</sup>                                              | 5.3 (5.1; 5.7)                               | 5.3 (5.1; 5.8)                                 | 0.560           |
| HbA <sub>1c</sub> (mmol/mol) <sup>b</sup>                                       | 34 (32; 39)                                  | 34 (32; 40)                                    | 0.560           |
| Glucose tolerance status<br>(% NGT / IFG / IGT /<br>IFG+IGT / T2D) <sup>c</sup> | 57.1 / 6.3 / 10.7 / 4.1 /<br>12.2            | 43.1 / 6.3 / 8.9 / 5.7 /<br>20.7               | <0.001          |
| LDL cholesterol (mmol/l)                                                        | 3.91 (3.26; 4.64)                            | 3.94 (3.19; 4.58)                              | 0.493           |
| HDL cholesterol (mmol/l)                                                        | 1.44 (1.19; 1.75)                            | 1.43 (1.17; 1.72)                              | 0.179           |
| Triacylglycerols (mmol/l)                                                       | 1.34 (0.96; 1.88)                            | 1.41 (1.03; 2.10)                              | 0.021           |
| Smoking (% current or former<br>/ never)                                        | 49.6 / 50.4                                  | 55.2 / 44.8                                    | 0.041           |
| Alcohol consumption<br>(% none / moderate / high) <sup>d</sup>                  | 25.8 / 54.1 / 20.1                           | 35.8 / 44.2 / 20.0                             | <0.001          |
| Physical activity<br>(% active / inactive) <sup>e</sup>                         | 44.4 / 55.6                                  | 34.6 / 65.4                                    | <0.001          |
| Biomarkers of subclinical<br>inflammation                                       |                                              |                                                |                 |
| Leukocytes (x10 <sup>-3</sup> /μl)                                              | 5.8 (5.0; 6.9)                               | 6.3 (5.2; 7.5)                                 | <0.001          |

|                             |                 |                 |        |
|-----------------------------|-----------------|-----------------|--------|
| hsCRP (nmol/l)              | 15 (8; 32)      | 19 (9; 40)      | 0.004  |
| SAA (mg/l)                  | 3.5 (2.3; 5.9)  | 3.8 (2.5; 6.5)  | 0.063  |
| Fibrinogen (g/l)            | 2.8 (2.5; 3.2)  | 2.9 (2.5; 3.3)  | 0.001  |
| IL-6 (pg/ml)                | 1.8 (0.9; 3.0)  | 2.5 (1.4; 4.2)  | <0.001 |
| Adiponectin (total) (µg/ml) | 8.7 (6.0; 12.0) | 8.9 (6.2; 12.7) | 0.160  |

Data are given as median and 25<sup>th</sup>/75<sup>th</sup> percentiles or percentages.

T2D, type 2 diabetes.

<sup>a</sup> HbA<sub>1c</sub> data are given as transformed HbA<sub>1c</sub> as described in Methods. Untransformed data: 5.6 (5.4; 5.9) and 5.6 (5.4; 6.0)%.

<sup>b</sup> HbA<sub>1c</sub> data are given as transformed HbA<sub>1c</sub> as described in Methods. Untransformed data: 38 (36; 41) and 38 (36; 42) mmol/mol.

<sup>c</sup> Glucose tolerance status at baseline unclear for 112 F4 participants (9.7%) and 75 non-participants (15.2%)

<sup>d</sup> Moderate defined as >0 to <40 g/day for men, >0 to <20 g/day for women; high defined as ≥40 g/day for men and ≥20 g/day for women.

<sup>e</sup> Active defined as ≥1 hour leisure-time physical activity/week in summer and in winter.
