# Supplementary material for: Association of subclinical inflammation with deterioration of glycaemia before the diagnosis of type 2 diabetes: the KORA S4/F4 study
Source: Springer Nature journal article supplement (doi:10.1007/s00125-015-3679-4), 2015-07-08
Supplement: MOESM3 [file 125_2015_3679_MOESM3_ESM.pdf › 125_2015_3679_MOESM3_ESM.pdf]

**ESM Table 3** Association between immune mediators at baseline (KORA S4, 1999-2001) and changes in HbA<sub>1c</sub> between baseline KORA S4 and 7-year follow-up examination (KORA F4, 2006-2008) using BMI instead of waist circumference as covariable

| Variable                          | Model 1       |                   | Model 2       |                   | Model 3      |              | Model 4      |              | Model 5      |              |
|-----------------------------------|---------------|-------------------|---------------|-------------------|--------------|--------------|--------------|--------------|--------------|--------------|
|                                   | $\beta$       | <i>p</i>          | $\beta$       | <i>p</i>          | $\beta$      | <i>p</i>     | $\beta$      | <i>p</i>     | $\beta$      | <i>p</i>     |
| Leukocytes (10 <sup>-3</sup> /μl) | <b>0.176</b>  | <b>0.001</b>      | <b>0.185</b>  | <b>&lt;0.001</b>  | <b>0.147</b> | <b>0.004</b> | <b>0.153</b> | <b>0.003</b> | <b>0.154</b> | <b>0.003</b> |
| hsCRP (nmol/l)                    | <b>0.045</b>  | <b>&lt;0.0001</b> | <b>0.048</b>  | <b>&lt;0.0001</b> | <b>0.032</b> | <b>0.006</b> | <b>0.029</b> | <b>0.009</b> | <b>0.029</b> | <b>0.010</b> |
| SAA (mg/l)                        | <b>0.036</b>  | <b>0.017</b>      | <b>0.039</b>  | <b>0.011</b>      | <b>0.030</b> | <b>0.047</b> | 0.028        | 0.061        | 0.027        | 0.070        |
| Fibrinogen (g/l)                  | 0.098         | 0.077             | 0.087         | 0.124             | 0.052        | 0.363        | 0.050        | 0.379        | 0.058        | 0.305        |
| IL-6 (pg/ml)                      | <b>0.022</b>  | <b>0.034</b>      | <b>0.025</b>  | <b>0.020</b>      | 0.015        | 0.159        | 0.011        | 0.317        | 0.011        | 0.293        |
| Adiponectin (μg/ml)               | <b>-0.070</b> | <b>0.007</b>      | <b>-0.069</b> | <b>0.008</b>      | -0.033       | 0.224        | -0.033       | 0.219        | -0.036       | 0.189        |

The table shows  $\beta$  coefficients and *p* values from linear regression analyses with changes in HbA<sub>1c</sub> (HbA<sub>1c</sub>[F4] minus HbA<sub>1c</sub>[S4]<sub>transformed</sub>) as dependent variable and log-transformed immune mediator levels as independent variables (except leukocyte count which was not log-transformed).

Model 1: adjusted for age, sex and HbA<sub>1c</sub>[S4]<sub>transformed</sub>

Model 2: model 1 + smoking, physical activity, alcohol intake

Model 3: model 2 + BMI, LDL cholesterol, HDL cholesterol, triacylglycerols

Model 4: model 3 + changes in BMI (BMI[F4] minus BMI[S4]))

Model 5: model 4 + family history of diabetes
