# Supplementary material for: Association of subclinical inflammation with deterioration of glycaemia before the diagnosis of type 2 diabetes: the KORA S4/F4 study
Source: Springer Nature journal article supplement (doi:10.1007/s00125-015-3679-4), 2015-07-08
Supplement: MOESM4 [file 125_2015_3679_MOESM4_ESM.pdf › 125_2015_3679_MOESM4_ESM.pdf]

**ESM Table 4** Squared partial correlation coefficients ( $r^2$  in %) for the association between immune mediators at baseline (KORA S4, 1999-2001) and changes in HbA<sub>1c</sub> between baseline KORA S4 and 7-year follow-up examination (KORA F4, 2006-2008) shown in Table 3

| Variable                          | Model 1    | Model 2    | Model 3    | Model 4    | Model 5    |
|-----------------------------------|------------|------------|------------|------------|------------|
| Leukocytes ( $10^3/\mu\text{l}$ ) | <b>1.4</b> | <b>1.6</b> | <b>1.0</b> | <b>1.0</b> | <b>1.0</b> |
| hsCRP (nmol/l)                    | <b>2.0</b> | <b>2.2</b> | <b>1.0</b> | <b>0.9</b> | <b>0.9</b> |
| SAA (mg/l)                        | <b>0.7</b> | <b>0.8</b> | <b>0.5</b> | <b>0.5</b> | 0.5        |
| Fibrinogen (g/l)                  | 0.4        | 0.3        | 0.1        | 0.1        | 0.1        |
| IL-6 (pg/ml)                      | <b>0.5</b> | <b>0.7</b> | 0.2        | 0.1        | 0.1        |
| Adiponectin ( $\mu\text{g/ml}$ )  | <b>0.9</b> | <b>0.8</b> | 0.2        | 0.2        | 0.2        |

The table shows squared partial coefficients ( $r^2$ ) as percentages (%) from linear regression analyses with changes in HbA<sub>1c</sub> (HbA<sub>1c</sub>[F4] minus HbA<sub>1c</sub>[S4]<sub>transformed</sub>) as dependent variable and log<sub>e</sub>-transformed immune mediator levels as independent variables (except leukocyte count which was not log-transformed). **Bold print** indicates significant associations between immune mediators and changes in HbA<sub>1c</sub> in the corresponding analyses in Table 3 of the main manuscript.

Model 1: adjusted for age, sex and HbA<sub>1c</sub>[S4]<sub>transformed</sub>

Model 2: model 1 + smoking, physical activity, alcohol intake

Model 3: model 2 + waist circumference, LDL cholesterol, HDL cholesterol, triacylglycerols

Model 4: model 3 + changes in waist circumference (WC[F4] minus WC[S4]))

Model 5: model 4 + family history of diabetes
